# Supplementary material
Source: ML conference proceedings conference paper supplement (https://openreview.net/forum?id=Bxr45keYrf)
Supplement: supplementary_material [file attachment]

# Evo-NeRF: Evolving NeRF for Sequential Robot Grasping ※ Supplemental Material ※

Anonymous Author(s)

Affiliation

Address

email

## 1 A Evo-NeRF

### 2 A.1 NeRF and scene parameters

3 We use the default Instant-NGP parameters except for the following changes: (1) we use a learning  
4 rate of 0.02 instead of 0.01 (2) we use a hash table size of  $2^{17}$  feature vectors instead of  $2^{19}$  (3) we use  
5 a density network with 16 hidden neurons instead of 64. These changes made small improvements  
6 in geometry learning speed. We also increase the frequency of extrinsic optimization gradient steps  
7 (`n_steps_between_cam_updates` parameter) to every step, improving the speed of convergence on  
8 noisy camera poses added during arm motion. The scene bounds (“`aabb_scale`”) are set to a 2 meter  
9 cube to fit the entire workspace inside, with a scene scale of 1.0. We set the near distance for  
10 raymarching during NeRF training to be 0, to avoid missing objects if they are close to the camera.

### 11 A.2 Capture trajectory

12 The full capture trajectory is centered at the center of the workspace, with  $\theta$  values ranging from  $85^\circ$   
13 to  $75^\circ$  ( $\theta$  rotates about the z axis upwards from the table, such that x points away from the robot).  
14 The  $\phi$  range, which describes inclination from the table surface, goes from  $15^\circ$  to  $50^\circ$ . The arm  
15 makes 3 sweeps about the z axis, linearly varying the  $\phi$  value between the range on each sweep, as  
16 visualized by the red arrow in Fig. 1. We use 1280x720 images, with a whitebalance and exposure  
17 which are held static after an auto-calibration from the camera.

### 18 A.3 Evo-NeRF parameters

19 For TV-regularization, we sample  $N = 256000$  points at each iteration with a rejection sampling  
20 threshold of 0.01 for minimum local density. The sampling radius  $r$  we use is 0.3mm, and the loss  
21 scaling  $\lambda_{TV}$  is  $\frac{15}{N}$ . TV-loss is implemented as a set of CUDA kernels for speed, resulting in only about  
22 a 10% slowdown of training. To implement coarser ray sampling, the value of the parameter which  
23 controls sample acceleration, (“`cone_angle_constant`” in Instant-NGP) is 0.04, up from the default  
24 value of 0.004.

## 25 B Dataset generation

26 We choose the 7 object meshes based on the three criteria: (1) likely to be made of glass, (b) fit  
27 within the workspace of YuMi, (c) has a watertight mesh with outward-facing surface normals.

28 For grasp generation, we calculate the stable pose orientations of each mesh and rank them by their  
29 quasi-static probabilities using Trimesh [1]. Based on the ranking, we select the top 10 stable poses  
30 to sample 1000 grasps. We ignore stable poses where no grasp exists. We analytically calculate  
31 grasp success via robust wrench resistance [2]. We perturb the grasp pose with small translation

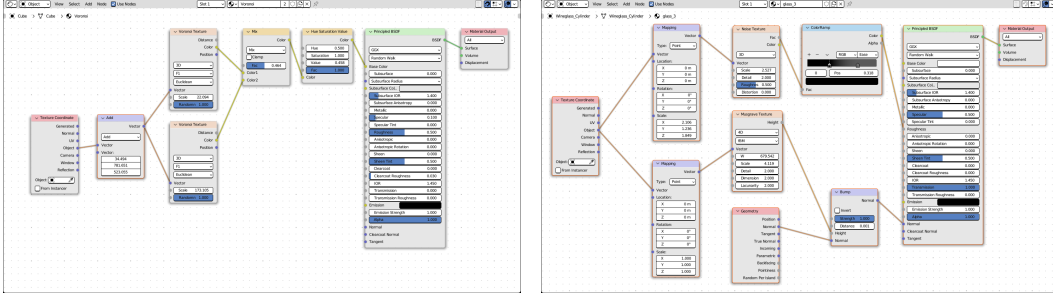

Figure 1: Random worksurace texture (left) and glass texture (right) in blender. We use textures to randomize the background and simulate imperfection in glass.

32 noise (from a normal distribution with  $\mu = 0$ ,  $\sigma = 0.003$  m) and small rotation noise (from a normal  
 33 distribution with  $\mu = 0$ ,  $\sigma = 0.003$  rad) and calculate wrench resistance on 10 samples for estimat-  
 34 ing the grasp success probability. We create multi-object scenes based on single-object scenes. To  
 35 do so, we sequentially sample objects on different stable poses and randomly generate a SE(2) trans-  
 36 form that will not collide with the objects that have already been placed on the planar surface. We  
 37 define the  $z$ -axis as normal and pointing outward from the worksurface. We sample  $x$  and  $y$  posi-  
 38 tion from a uniform distribution between  $\pm 0.2$  m and the  $z$ -axis rotation from a uniform distribution  
 39 between  $\pm \frac{\pi}{2}$ . We reuse the grasps sampled for single object scenes and filter out the grasps that are  
 40 in collision. We check collision between objects and grasps with the Flexible Collision Library [3].  
 41 We meshify the grasps for collision checking by using a YuMi gripper mesh model under the rigid  
 42 transform given by the grasp pose.

43 To reflect the reachable workspace of the robot for capturing images, we record the camera intrinsics  
 44 and 52 camera poses along the image capture trajectory with the physical robot. We use fewer views  
 45 during dataset generation than physical capture trajectories to speed Blender rendering. For each of  
 46 the simulated environments, we render images at the recorded camera poses with small translation  
 47 noise ( $\pm 5$  mm) and rotation noise ( $\pm 5^\circ$ ). We randomize the number of lights between 1 and 5, light  
 48 location, and total wattage. To speed up rendering, we reduce the numbers of rays cast to a minimum  
 49 level to achieve realistic renders, and use CUDA-based renderer in Blender.

50 To randomize background and simulate real-world imperfections found in glass, we use two textures  
 51 in Blender (Fig. 1). We use a randomized texture for the background consists of two blended random  
 52 “Voronoi” nodes to produce both high and low frequency patterns. For the glass texture, we create a  
 53 transparent material with an index of refraction that matches glass and many plastics. We also add  
 54 random textures to simulate hazy glass and scratches. Prior work observed that NeRF performed  
 55 better on real-world glass than simulated glass, observing that simulated glass had no imperfections.

56 We then train a NeRF model for each scene for 1000 steps, comparable to the number used on  
 57 the robot in real-time, and render depth images from NeRF. We also generate ground-truth depth  
 58 images using Pyrender [4] for each scene, using the same camera extrinsics as the NeRF rendered  
 59 depth image. In experiments, each scene has between 1 and 3 objects and there are a total of 8667  
 60 distinct scenes, 237 held out as a test set.

## 61 C Rad-Net

### 62 C.1 Depth rendering

63 When rendering depth from NeRF, we use a minimum transmittance threshold of 0.9, which means  
 64 that rays which have passed through a total of 0.1 density terminate. This extra sensitivity is to allow  
 65 perceiving depth from transparent objects. Because density has physical meaning, in practice the  
 66 value of this parameter is reusable across all scenes, in our experience not requiring tuning. During

| Objects           | DexNet     |              | Rad-Net    |              |
|-------------------|------------|--------------|------------|--------------|
|                   | Early Stop | Full Capture | Early Stop | Full Capture |
| Wineglass Upright | 0/3        | 3/3          | 3/3        | 3/3          |
| Whiskey Glass     | 0/3        | 1/3          | 3/3        | 3/3          |
| Wineglass Sideway | 0/3        | 2/3          | 2/3        | 2/3          |
| Plastic Cup       | 0/3        | 0/3          | 3/3        | 3/3          |
| Bowl              | 0/3        | 2/3          | 3/3        | 3/3          |
| Tape Dispenser    | 3/3        | 3/3          | 1/3        | 2/3          |
| Square Bowl       | 0/3        | 1/3          | 3/3        | 3/3          |
| Tall Glass        | 0/3        | 3/3          | 3/3        | 3/3          |
| Light Bulb        | 0/3        | 0/3          | 3/3        | 2/3          |
| Average           | 11%        | 56%          | 89%        | 89%          |

Table 1: Detailed single object retrieval results. For each object, the experiment is repeated 3 times. The number show the success grasps out of the 3 grasps. The last row show the average success grasp over all objects. Note that all of Rad-Net’s failures come from the sideways wineglass, tape dispenser, and lightbulb. The latter two suffer in performance because they are highly out of distribution shaped objects, and the former experiences a 66% success rate because grasp precision is much more important for grasping the stem or base, where a small pose error can knock the wineglass out of position.

67 depth rendering we ignore density which exists more than 35cm above the workspace surface, a  
68 value 2x larger than the largest test object, to help in removing floaters far above the scene.

## 69 C.2 Architecture details

70 The architecture we use is identical to Zhu et al. [5], except for adding an additional fully-connected  
71 layer at the output of the rotation prediction network to be more agnostic to input patch sizes. The  
72 location prediction network uses an equivariant U-Net architecture, and the rotation network is a  
73 9-layer equivariant ResNet. The rotational equivariance operates on the cyclic group  $C_8$  for the  
74 location prediction network and on the quotient group  $C_{16}/C_2$  for the rotation network as top-down  
75 grasp rotation is invariant to rotations by  $\pi$  radians.

## 76 C.3 Training details

77 We use PyTorch Lightning for training, with a batch size of 64 for the rotation network and 32 for  
78 the location network. We use the Adam optimizer with learning rate 1e-3 and weight decay 1e-5.  
79 Models are trained for 100 epochs with an exponential learning rate decay of 0.994. The patches  
80 used as input to the rotation network are augmented by 5 pixels of random translation, and the  
81 location depth images are augmented by 10% translation,  $\pm 5^\circ$  shear, and a scale range of 80% to  
82 100%.

## 83 D Additional result details

### 84 D.1 Single object

85 Table 1 reports the per-object success for Rad-Net and Dex-Net on early-stopped and full capture  
86 trajectories, along with a discussion of their implications in the caption.

### 87 D.2 Decluttering

88 Table 2 reports per-scene success for all scenes for Dex-Net and Rad-Net on Evo-NeRF as well as  
89 training NeRF from scratch, along with a discussion of the results in the caption.

### 90 D.3 Upside down glasses

91 In all of our experiments we test on graspable, upright objects. So, a natural question is whether Rad-  
92 Net has learned a trivial grasp function, like grasping at the edge of any round object. To answer this

| Scene (N objects) | Dex-Net, NeRF updated | Rad-Net, NeRF from scratch | Rad-Net, NeRF updated |
|-------------------|-----------------------|----------------------------|-----------------------|
| 0(4)              | 1,4,3                 | 4,4,4                      | 4,4,4                 |
| 1(5)              | 1,4,2                 | 3,4,4                      | 4,4,4                 |
| 2(4)              | 1,3,4                 | 3,4,0                      | 0,3,3                 |
| 3(4)              | 1,3,0                 | 2,4,2                      | 3,3,3                 |
| 4(5)              | 2,3,3                 | 4,3,2                      | 4,2,4                 |
| 5(4)              | 1,1,1                 | 4,4,4                      | 3,2,3                 |

Table 2: Detailed decluttering results. Each scene is repeated 3 times and the method is given as many grasp attempts as the number of objects. Numbers in the parenthesis show the number of objects in this scene. Numbers in the table show the number of objects extracted after all actions finish (higher is better). Scene 2 seems to be an outlier in performance for Rad-Net, with 2 runs where no objects were cleared. This is due to a specific wineglass which Rad-Net consistently collided with during grasps, resulting in an early failure for the trial.

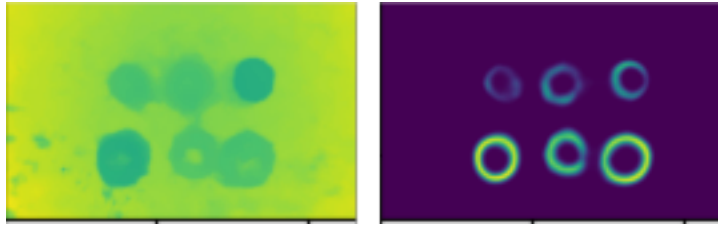

Figure 2: Heatmap output for objects including upside-down glasses. In this scene the top 3 objects are upside-down (and hence ungraspable) and the bottom 3 are graspable. The left image shows depth rendered from NeRF and the right image shows the location heatmap output by Rad-Net. Note how the heatmap activates much less on upside-down objects (<15% confidence) compared to graspable glasses (80% confidence).

93 question we explore what Rad-Net outputs on ungraspable, upside-down objects to sanity check its  
 94 output. To do this we run a decluttering task with 3 upright and 3 upside down glasses, and inspect  
 95 the confidence outputs on upside down glasses compared to upright. Given 3 actions, the system  
 96 correctly removes the 3 graspable glasses and leaves the upside-down ones untouched. Fig 2 shows  
 97 Rad-Net’s output on this scene before the first grasp. Although the upside down glasses have ring-  
 98 like heatmap outputs similar to upright cups, the highest activation on upside down glasses is 15%,  
 99 which suggests that Rad-Net seems to have learned a non-trivial grasp function. Ideally, confidence  
 100 on impossible grasps would be near 0, a shortcoming that could perhaps be a result of an imbalanced  
 101 dataset, where more objects are upright than upside down. Cultivating a dataset with equal numbers  
 102 of graspable and ungraspable poses could address this issue.

## 103 References

- 104 [1] Dawson-Haggerty et al. trimesh. URL <https://trimsh.org/>.
- 105 [2] J. Mahler, M. Matl, X. Liu, A. Li, D. Gealy, and K. Goldberg. Dex-net 3.0: Computing robust  
 106 vacuum suction grasp targets in point clouds using a new analytic model and deep learning.  
 107 In *2018 IEEE International Conference on robotics and automation (ICRA)*, pages 5620–5627.  
 108 IEEE, 2018.
- 109 [3] J. Pan, S. Chitta, and D. Manocha. Fcl: A general purpose library for collision and proximity  
 110 queries. In *2012 IEEE International Conference on Robotics and Automation*, pages 3859–3866.  
 111 IEEE, 2012.
- 112 [4] M. Matl. Pyrender. <https://github.com/mmatl/pyrender>, 2019.
- 113 [5] X. Zhu, D. Wang, O. Biza, G. Su, R. Walters, and R. Platt. Sample efficient grasp learning using  
 114 equivariant models. *arXiv preprint arXiv:2202.09468*, 2022.
